# Supplementary material for: Sustainable xanthophylls-containing poly(ε-caprolactone)s: synthesis, characterization, and use in green lubricants
Source: Royal Society of Chemistry journal article supplement (doi:10.1039/d2ra04502h), 2022-01-01
Supplement: d2ra04502h1.pdf [file d2ra04502h1.pdf]

## Supplementary Information

# **Sustainable xanthophyll-containing poly( $\epsilon$ -caprolactone)s: synthesis, characterization, and its use in green lubricants**

Eloy Rodríguez-deLeón,<sup>a\*</sup> Moustapha Bah,<sup>a</sup> José E. Báez,<sup>b\*</sup> María T. Hernández-Sierra,<sup>c</sup> Karla J. Moreno,<sup>c</sup> Alejandro Nuñez-Vilchis,<sup>a</sup> José Bonilla,<sup>d</sup> and Kenneth J. Shea<sup>e</sup>

<sup>a</sup> Posgrado en Ciencias Químico Biológicas, Faculty of Chemistry, Autonomous University of Queretaro, Cerro de las Campanas 76010, Queretaro, Mexico.

<sup>b</sup> Department of Chemistry, Division of Natural and Exact Sciences, University of Guanajuato, Noria Alta s/n 36050, Guanajuato, Mexico.

<sup>c</sup> Department of Mechanical Engineering, National Technology of Mexico at Celaya, Celaya 38010, Guanajuato, Mexico.

<sup>d</sup> Centro de Investigación en Materiales Avanzados S.C. (CIMAV-Unidad Monterrey), Av. Alianza del Norte 202, PIIT, Autopista Monterrey-Aeropuerto Km 10 66628, Apodaca, N.L., Mexico.

<sup>e</sup> Department of Chemistry, University of California, Irvine, (UCI), Irvine, California 92697-2025, USA.

To whom correspondence should be addressed: Eloy Rodríguez-deLeón, e-mail: [eloy.rodriguez@uaq.mx](mailto:eloy.rodriguez@uaq.mx) and José E. Báez, e-mail: [jbaez@ugto.mx](mailto:jbaez@ugto.mx)

## Table of Contents

|                                                                                                                                                                                                                                                                                                                                              | <b>Page</b> |
|----------------------------------------------------------------------------------------------------------------------------------------------------------------------------------------------------------------------------------------------------------------------------------------------------------------------------------------------|-------------|
| <b>Experimental</b>                                                                                                                                                                                                                                                                                                                          | <b>4</b>    |
| <b>ES1.</b> Reaction between lutein and ammonium decamolybdate.                                                                                                                                                                                                                                                                              | 4           |
| <b>ES2.</b> HPLC analysis.                                                                                                                                                                                                                                                                                                                   | 4           |
| <b>Table S1.</b> Gradient used for the analysis of carotenoid conversions.                                                                                                                                                                                                                                                                   | 4           |
| <b>HPLC chromatograms</b>                                                                                                                                                                                                                                                                                                                    | <b>5</b>    |
| <b>Fig S1.</b> HPLC chromatogram of free lutein.                                                                                                                                                                                                                                                                                             | 5           |
| <b>Fig S2.</b> HPLC chromatogram of the crude reaction product between lutein and ammonium decamolybdate.                                                                                                                                                                                                                                    | 6           |
| <b><sup>1</sup>H NMR spectra of Xanthophylls</b>                                                                                                                                                                                                                                                                                             | <b>7</b>    |
| <b>Fig. S3.</b> <sup>1</sup> H NMR spectrum of (3 <i>R</i> ,3' <i>R</i> ,6' <i>R</i> )-Lutein (500 MHz, CDCl <sub>3</sub> ).                                                                                                                                                                                                                 | 7           |
| <b>Fig. S4.</b> <sup>1</sup> H NMR spectrum of (3 <i>R</i> ,3' <i>S</i> )-Zeaxanthin (500 MHz, CDCl <sub>3</sub> ).                                                                                                                                                                                                                          | 8           |
| <b>Fig. S5.</b> <sup>1</sup> H NMR spectrum of (3 <i>R</i> ,3' <i>S</i> )-Astaxanthin (500 MHz, CDCl <sub>3</sub> ).                                                                                                                                                                                                                         | 9           |
| <b><sup>1</sup>H NMR spectra of Polyesters</b>                                                                                                                                                                                                                                                                                               | <b>10</b>   |
| <b>Fig. S6.</b> <sup>1</sup> H NMR spectrum of macrodiol (DP = 40) derived from zeaxanthin (500 MHz, CDCl <sub>3</sub> ).                                                                                                                                                                                                                    | 10          |
| <b>Fig. S7.</b> <sup>1</sup> H NMR spectrum of (3 <i>R</i> ,3' <i>S</i> )-Astaxanthin (500 MHz, CDCl <sub>3</sub> ).                                                                                                                                                                                                                         | 11          |
| <b>Table S2.</b> Chemical shift in <sup>1</sup> H NMR spectrum of the 3 & 3' protons of the xanthophylls upon polymerization.                                                                                                                                                                                                                | 11          |
| <b>Fig. S8.</b> <sup>1</sup> H NMR spectrum of macrodiol (DP = 9.9) derived from 1,8-octanediol (500 MHz, CDCl <sub>3</sub> ).                                                                                                                                                                                                               | 12          |
| <b>MALDI-TOF spectra</b>                                                                                                                                                                                                                                                                                                                     | <b>13</b>   |
| <b>Fig. S9.</b> Isotopic distribution calculated for <b>a</b> (C <sub>40</sub> H <sub>56</sub> O <sub>2</sub> , lutein or zeaxanthin) and <b>b</b> (C <sub>40</sub> H <sub>52</sub> O <sub>4</sub> K <sup>+</sup> , astaxanthin doped with K <sup>+</sup> ) in "ChemCalc" ( <a href="http://www.chemcalc.org">http://www.chemcalc.org</a> ). | 13          |

---

|                                                                                                                                         |           |
|-----------------------------------------------------------------------------------------------------------------------------------------|-----------|
| <b>Fig. S10.</b> MALDI-TOF spectrum of lutein-PCL.                                                                                      | 14        |
| <b>Fig. S11.</b> Expanded view of the MALDI-TOF spectrum of lutein-PCL.                                                                 | 15        |
| <b>Table S3.</b> MW of the expanded view of MALDI-TOF spectrum of lutein-PCL with DP = 20.                                              | 15        |
| <b>Fig. S12.</b> MALDI-TOF spectrum of 1,8-octanediol-PCL.                                                                              | 16        |
| <b>Fig. S13.</b> Expanded view of the 950-1350 m/z fragments of Figure S12 MALDI-TOF spectrum for the 1,8-octanediol-PCL.               | 17        |
| <b>Table S4.</b> Expanded view of the MALDI-TOF mass spectrum of the 1,8-octanediol-PCL with DP = 10.                                   | 17        |
| <b>Fig. S14.</b> Tentative structures of “epoxy”-xanthophylls-PCL.                                                                      | 18        |
| <b>Scheme S1.</b> Functionalization of “epoxy”-xanthophylls-PCL.                                                                        | 18        |
| <br>                                                                                                                                    |           |
| <b>Thermal properties of PCL Macrodiols (HOPCLOH) obtained by DSC</b>                                                                   | <b>19</b> |
| <br>                                                                                                                                    |           |
| <b>Fig. S15.</b> DSC thermograms (cooling, $T_c$ ) of <b>a</b> ) 1,8-octanediol-PCL (DP = 40), and <b>b</b> ) zeaxanthin-PCL (DP = 40). | 19        |
| <b>Fig. S16.</b> DSC thermograms of astaxanthin-PCL.                                                                                    | 19        |

---

## Experimental

**ES1.** *Reaction between lutein and ammonium decamolybdate.* - Into a flask of 25 mL 288.5 mg of lutein (0.505 mmol), 3 mg of ammonium decamolybdate (NH<sub>4</sub>)<sub>8</sub>[Mo<sub>10</sub>O<sub>34</sub>], and 12 mL of 1,2-dichloroethane (DCE) were placed. The mixture was heated to 80 °C for 24 hours and analyzed by reverse-phase HPLC every 30 minutes. 0.5 mL of a sample of the crude reaction product was collected and diluted in 10 mL of acetone. This solution was newly diluted in 10-fold acetone and filtered on a disc of nylon with 0.22 µm pore size.

**ES2.** *HPLC Analysis.* - HPLC analysis was carried out on a Waters equipment (Milford, MA, USA), composed of a 2695e quaternary pump and a 2998 diode array detector (DAD). The data acquisition was performed by the Empower 3 software (Waters®). Chromatographic conditions: *Column:* Develosil RP-aqueous C<sub>30</sub>, 5µm, 140Å, 250 x 4.6 mm i.d.; *flow rate:* 0.7 mL/min; *detection at λ* = 450 nm; *injection volume:* 10 µL; *run time:* 35 minutes; *mobile phase:* gradient of methanol (MeOH)–methyl tert-butyl ether (MTBE)–H<sub>2</sub>O (Table S1.).

**Table S1.** Gradient used during the analysis of carotenoid conversions.

| Time (minutes) | MeOH (%) | MTBE (%) | H <sub>2</sub> O (%) |
|----------------|----------|----------|----------------------|
| 0              | 81       | 15       | 4                    |
| 15             | 66       | 30       | 4                    |
| 23             | 16       | 80       | 4                    |
| 27             | 16       | 80       | 4                    |
| 27.1           | 81       | 15       | 4                    |
| 35             | 81       | 15       | 4                    |

## HPLC chromatograms:

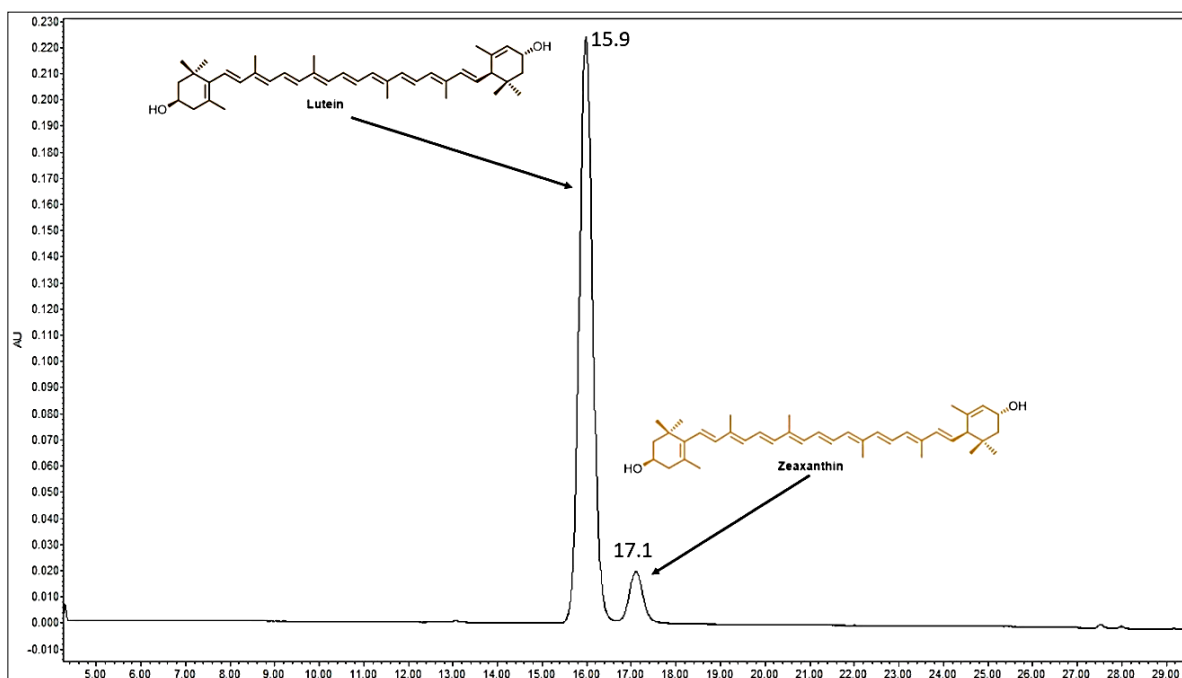

**Fig S1.** HPLC chromatogram of free lutein with retention time (TR) of 15.9 minutes. The peak at TR equal to 17.1 minutes corresponds to natural zeaxanthin present in the marigold oleoresin.

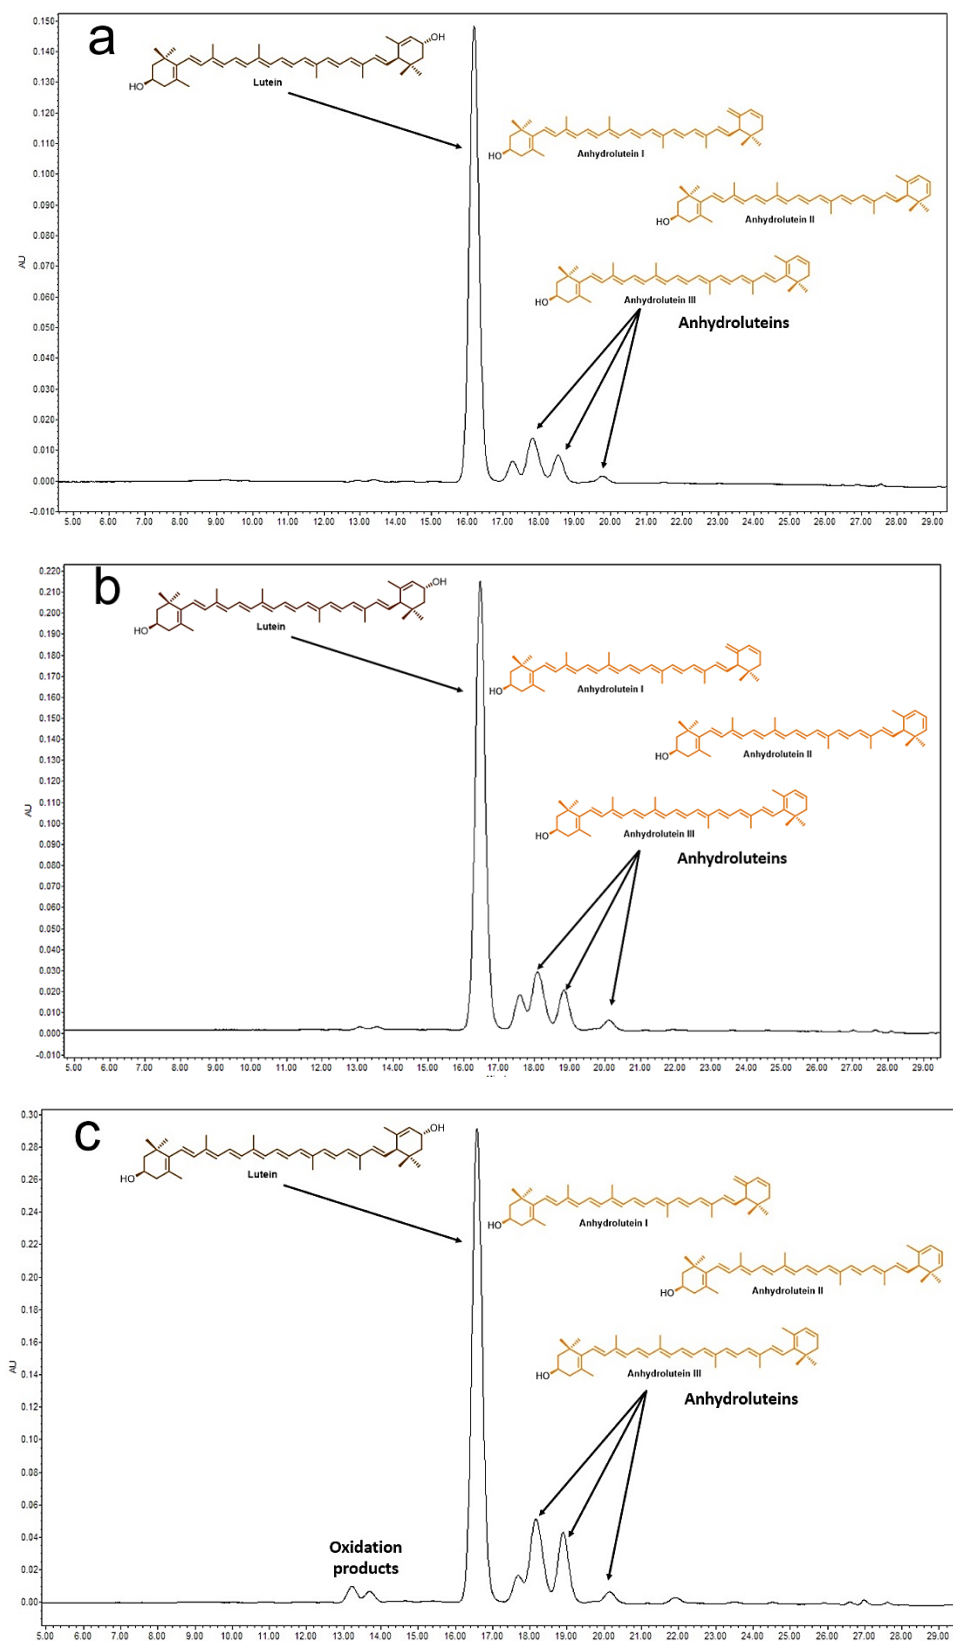

**Fig S2.** HPLC chromatogram of the crude reaction product between lutein and ammonium decamolybdate at 2 (a), 4 (b), and 24 hours (c). The peaks with the longer retention times (compounds less polar than lutein) indicate the presence of dehydration products.

## <sup>1</sup>H NMR spectra of Xanthophylls:

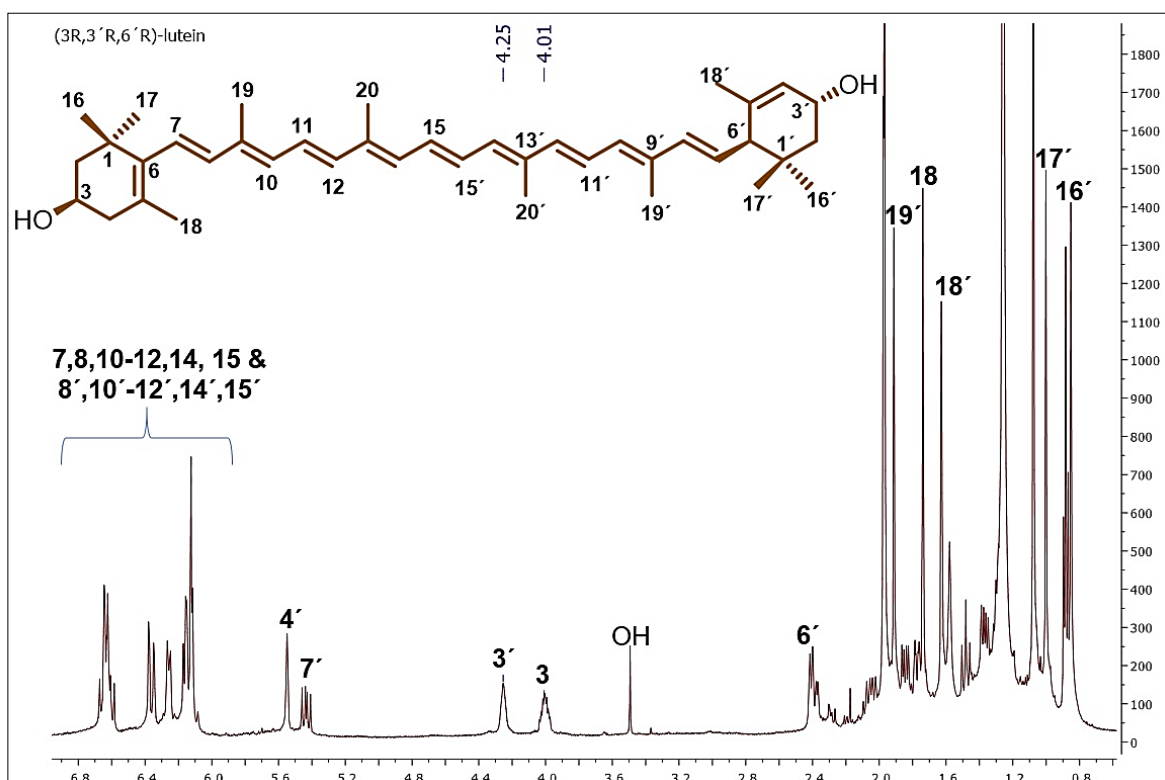

**Fig. S3.** <sup>1</sup>H NMR spectrum of (3*R*,3'*R*,6'*R*)-Lutein (500 MHz, CDCl<sub>3</sub>).

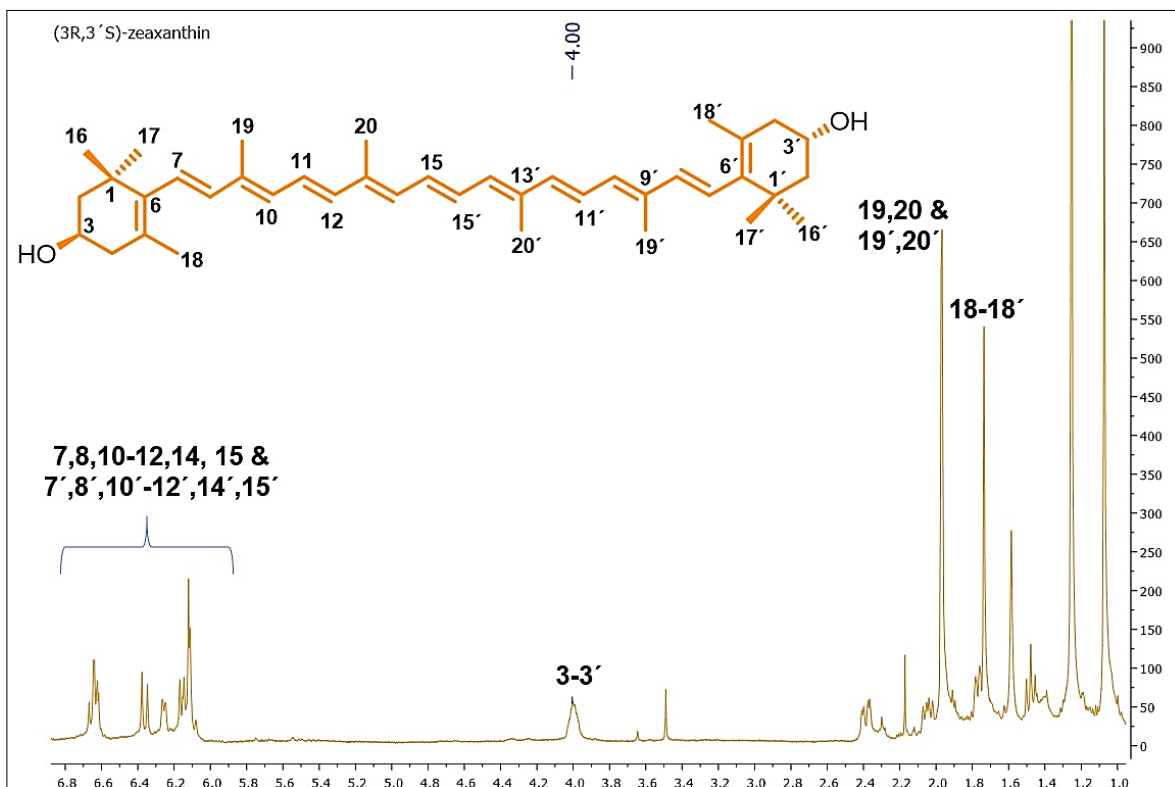

**Fig. S4.**  $^1\text{H}$  NMR spectrum of (3R,3'S)-Zeaxanthin (500 MHz,  $\text{CDCl}_3$ ).



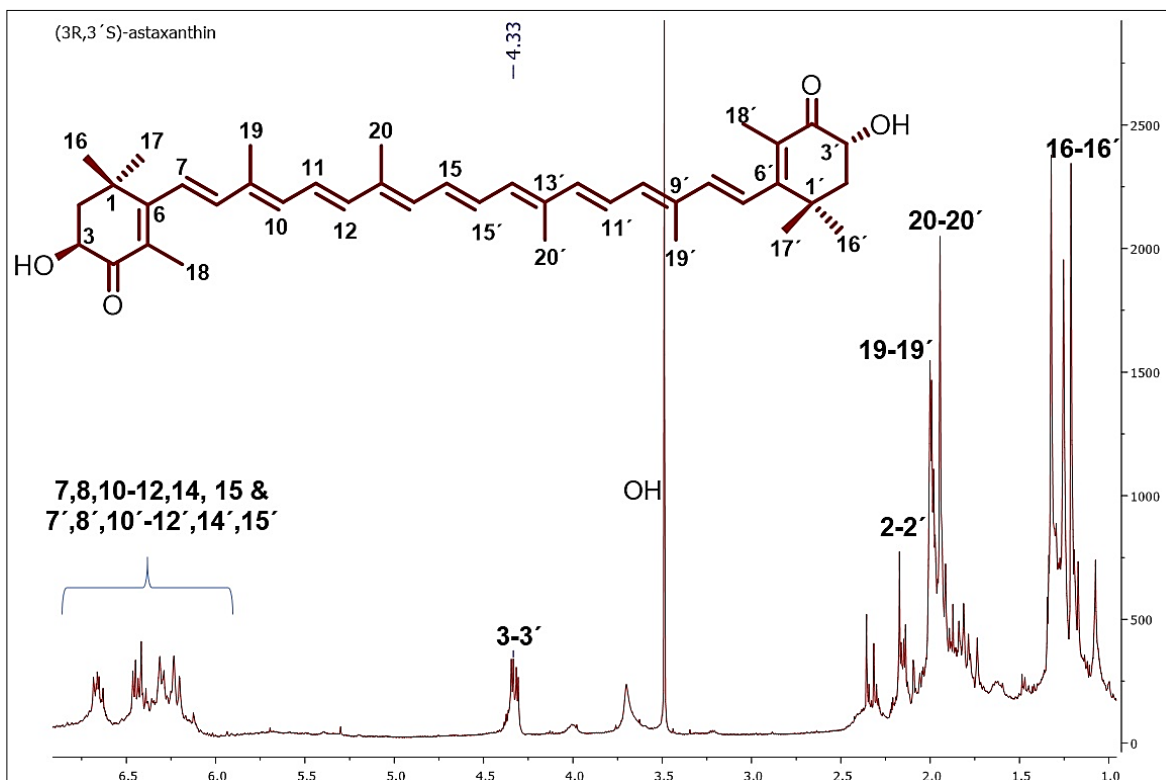

**Fig. S5.**  $^1\text{H}$  NMR spectrum of (3R,3'S)-Astaxanthin (500 MHz,  $\text{CDCl}_3$ ).

# <sup>1</sup>H NMR spectra of Polyesters:

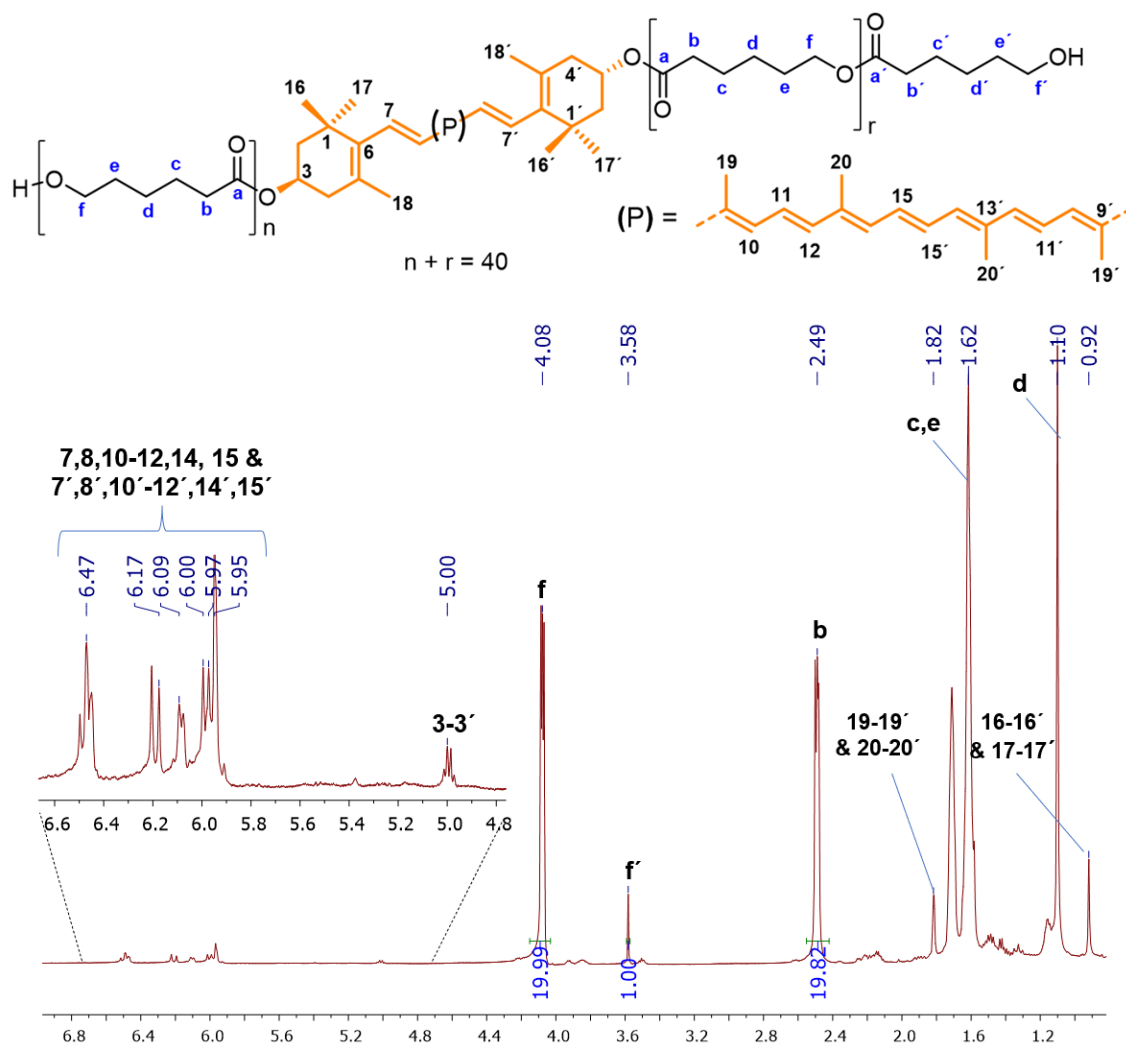

**Fig. S6.** <sup>1</sup>H NMR spectrum of macrodiol (DP = 40) derived from zeaxanthin (500 MHz, CDCl<sub>3</sub>).

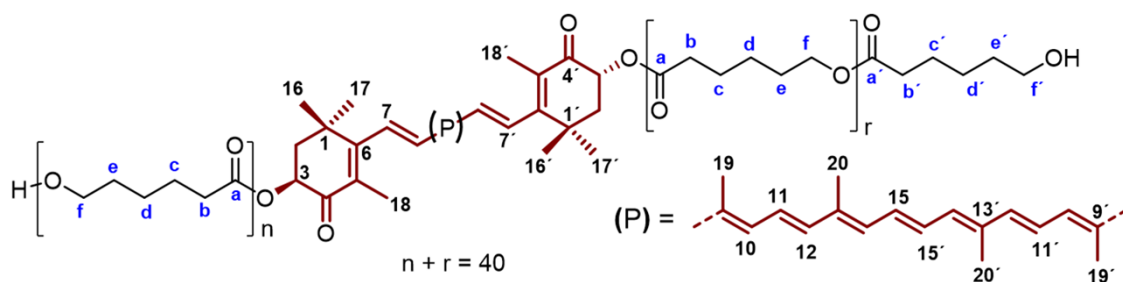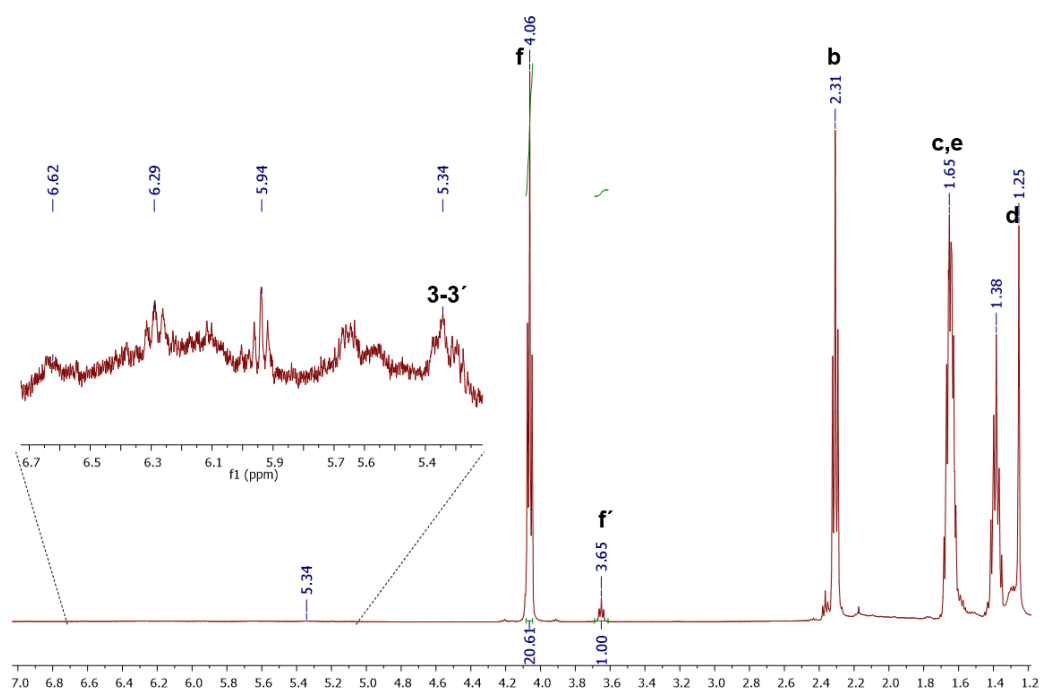

**Fig. S7.**  $^1\text{H}$  NMR spectrum of macrodiol (DP = 41.2) derived from astaxanthin (500 MHz,  $\text{CDCl}_3$ ).

**Table S2.** Chemical shift in  $^1\text{H}$  NMR spectrum of the 3 & 3' protons of the xanthophylls upon polymerization.

| Xanthophyll                                    | Free Xanthophyll chemical shifts (ppm) |      | Xanthophyll-PCL chemical shifts (ppm) |      |
|------------------------------------------------|----------------------------------------|------|---------------------------------------|------|
|                                                | H-3                                    | H-3' | H-3                                   | H-3' |
| (3 <i>R</i> ,3' <i>R</i> ,6' <i>R</i> )-Lutein | 4.01                                   | 4.25 | 5.00                                  | 5.26 |
| (3 <i>R</i> ,3' <i>S</i> )-Zeaxanthin          | 4.00                                   |      | 5.00                                  |      |
| (3 <i>R</i> ,3' <i>S</i> )-Astaxanthin         | 4.33                                   |      | 5.34                                  |      |

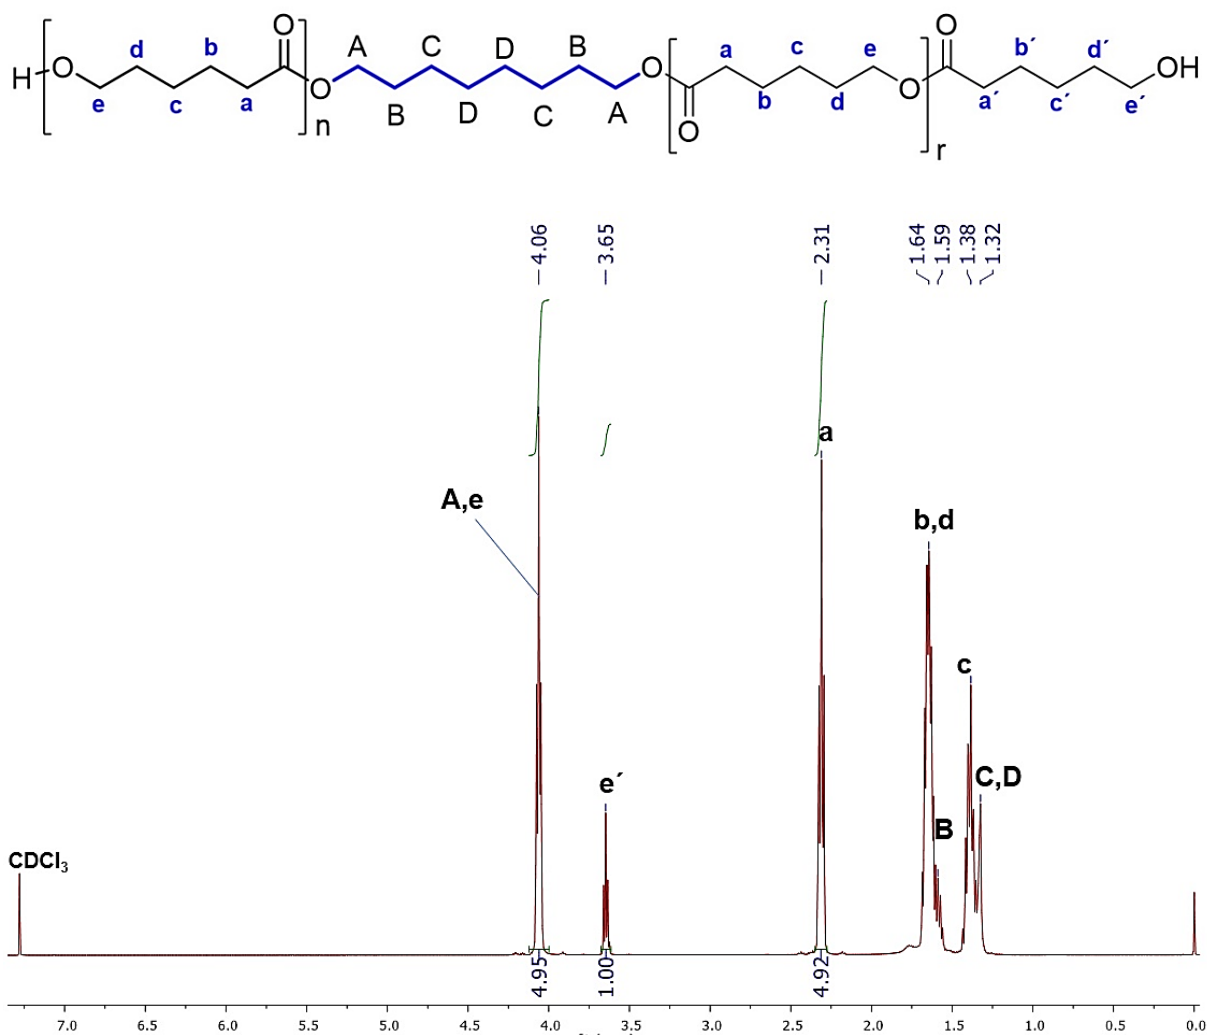

**Fig. S8.**  $^1\text{H}$  NMR spectrum of HOPCLOH with DP = 9.9 (500 MHz,  $\text{CDCl}_3$ ).

## MALDI-TOF spectra of polyesters:

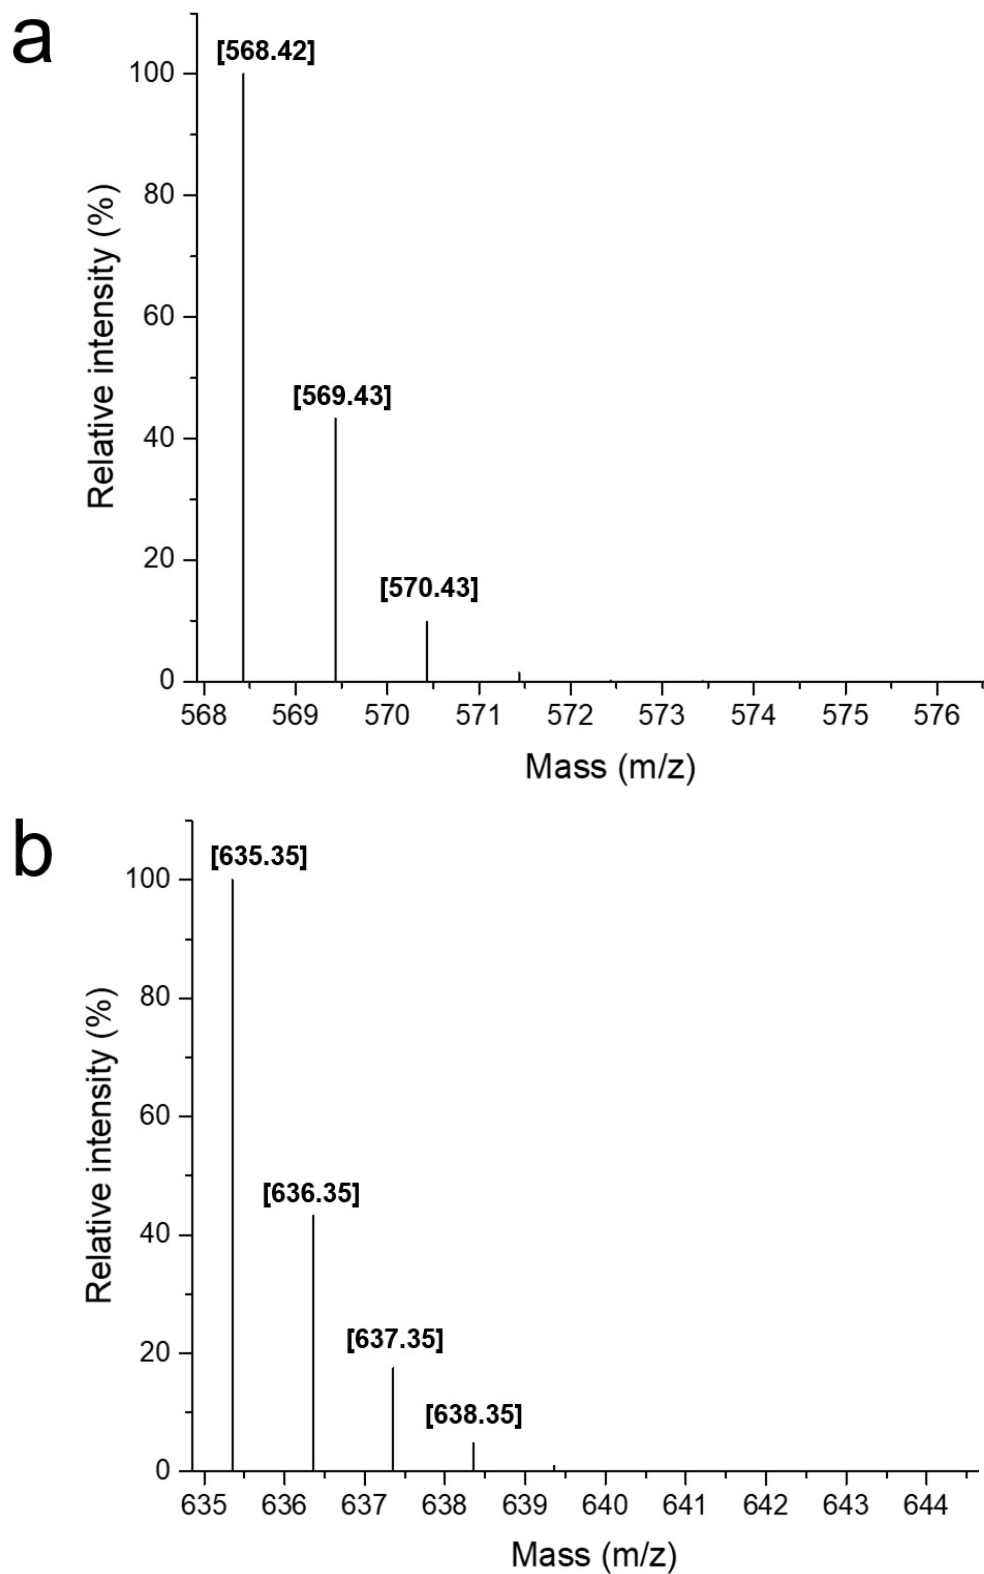

**Fig. S9.** Isotopic distribution calculated for **a** ( $C_{40}H_{56}O_2$ , lutein or zeaxanthin) and **b** ( $C_{40}H_{52}O_4K^+$ , astaxanthin doped with  $K^+$ ) in “ChemCalc” (<http://www.chemcalc.org>).

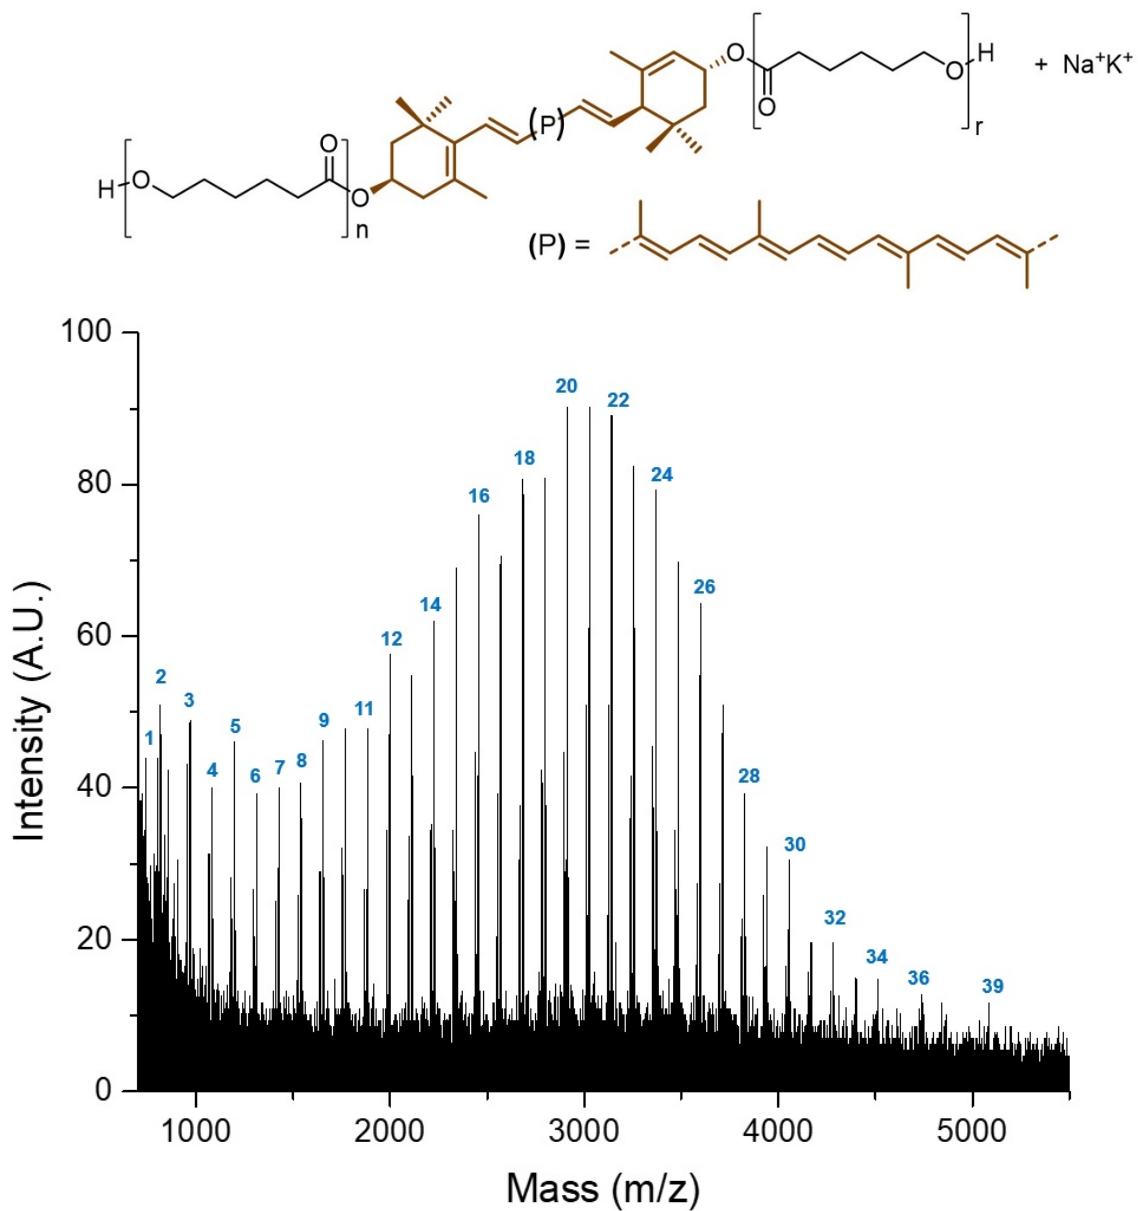

**Fig. S10.** MALDI-TOF spectrum of lutein-PCL; the number indicates the degree of polymerization (DP) of each peak.

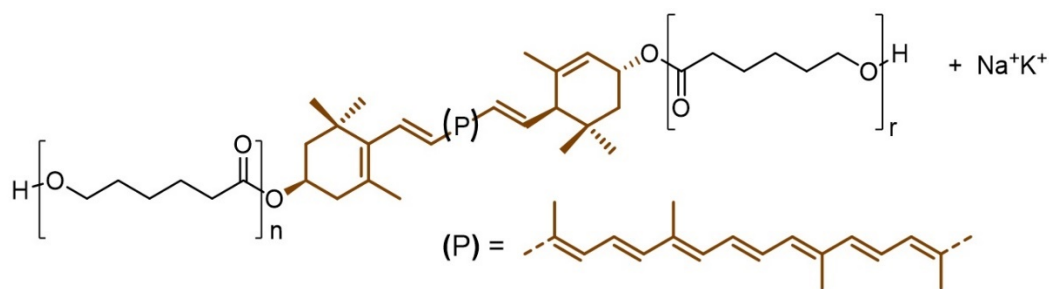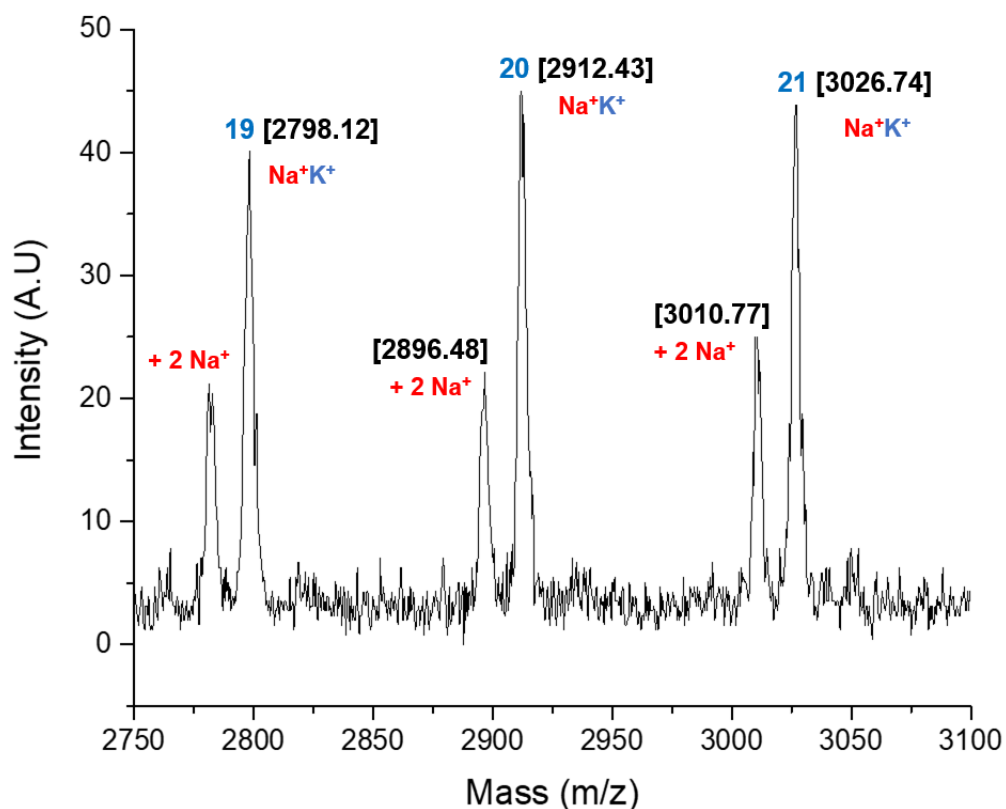

**Fig. S11.** MALDI-TOF spectrum of lutein-PCL; expanded view for the 2750-3100 m/z fragments of figure S10.

**Table S3.** MW of the expanded view of MALDI-TOF spectrum of lutein-PCL with DP = 20.

| Species | MW (g/mol) | Theoretical MW <sup>a</sup> (2 Na <sup>+</sup> ) | Experimental (2 Na <sup>+</sup> ) | Theoretical <sup>a</sup> (Na <sup>+</sup> K <sup>+</sup> ) | Experimental (Na <sup>+</sup> K <sup>+</sup> ) |
|---------|------------|--------------------------------------------------|-----------------------------------|------------------------------------------------------------|------------------------------------------------|
| DP 19   | 2799.62    | 2781.70                                          | 2782.11                           | 2797.67                                                    | 2798.12                                        |
| DP 20   | 2913.76    | 2895.76                                          | 2896.48                           | 2911.74                                                    | 2912.43                                        |
| DP 21   | 3027.90    | 3009.83                                          | 3010.77                           | 3025.81                                                    | 3026.74                                        |

<sup>a</sup> Calculated by the web service "ChemCalc" (<http://www.chemcalc.org>).

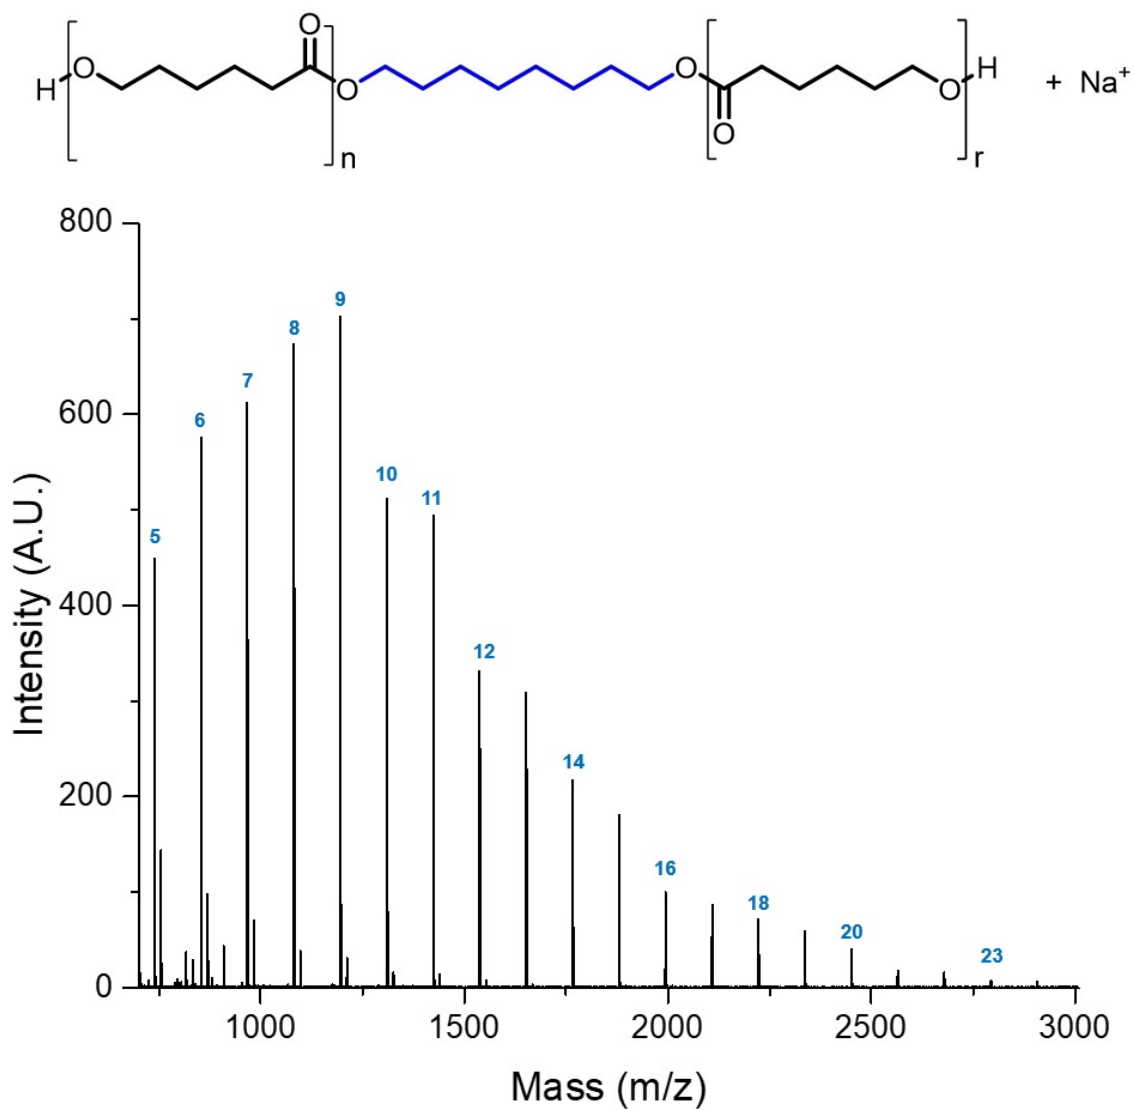

**Fig. S12.** MALDI-TOF spectrum of 1,8-octanediol-PCL; the number indicates the degree of polymerization of each peak.



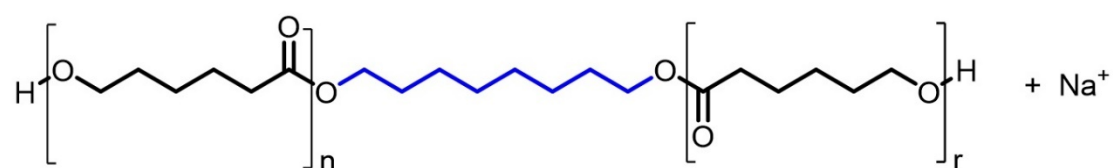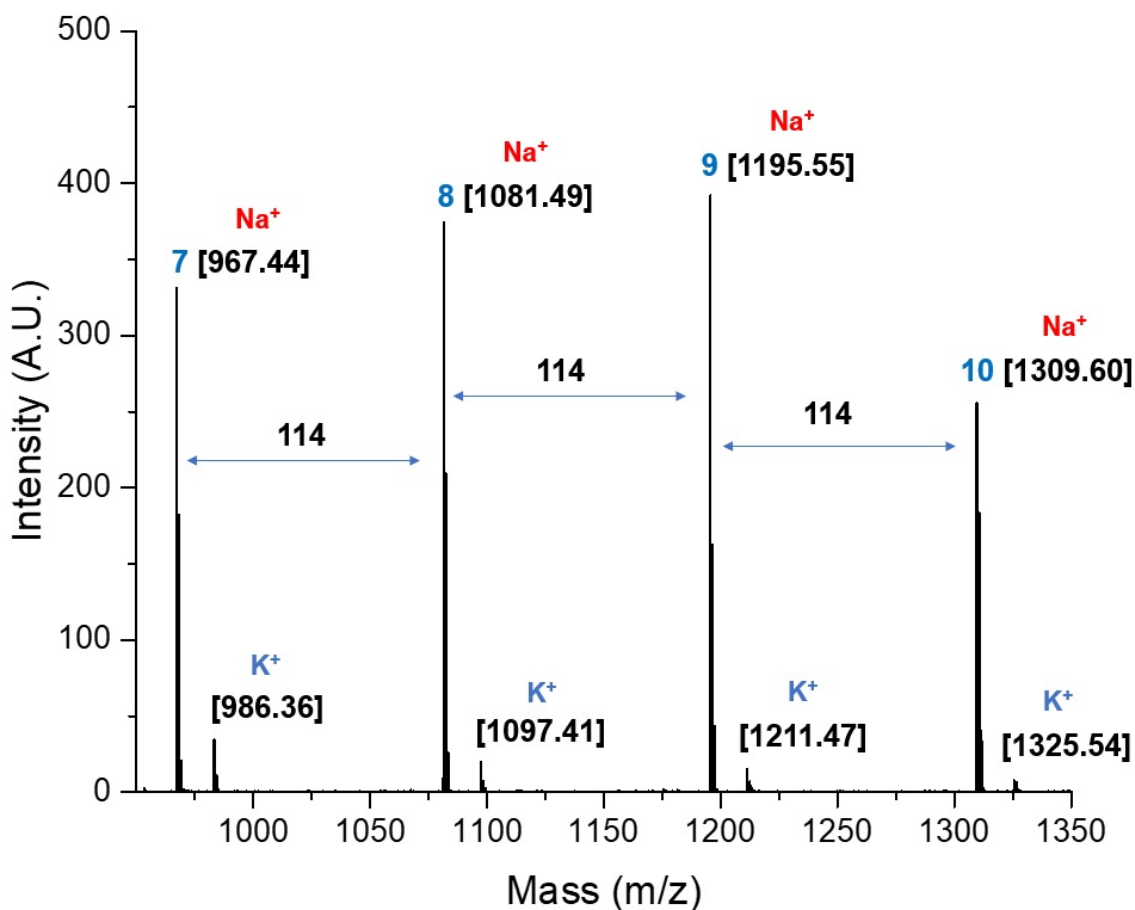

**Fig. S13.** Expanded view of the 950-1350 m/z fragments of Figure S12 MALDI-TOF spectrum for the 1,8-octanediol-PCL.

**Table S4.** MW of the expanded view of the MALDI-TOF mass spectrum of the 1,8-octanediol-PCL with DP = 10.

| Species | MW (g/mol) | Theoretical MW <sup>a</sup> (Na <sup>+</sup> ) | Experimental (Na <sup>+</sup> ) | Theoretical <sup>a</sup> (K <sup>+</sup> ) | Experimental (K <sup>+</sup> ) |
|---------|------------|------------------------------------------------|---------------------------------|--------------------------------------------|--------------------------------|
| DP 7    | 945.23     | 968.22                                         | 967.44                          | 984.32                                     | 986.36                         |
| DP 8    | 1059.37    | 1082.36                                        | 1081.49                         | 1098.47                                    | 1097.41                        |
| DP 9    | 1173.51    | 1196.50                                        | 1195.55                         | 1212.61                                    | 1211.47                        |
| DP 10   | 1287.65    | 1310.64                                        | 1309.60                         | 1326.75                                    | 1325.54                        |

<sup>a</sup> Calculated by the web service "ChemCalc" (<http://www.chemcalc.org>).

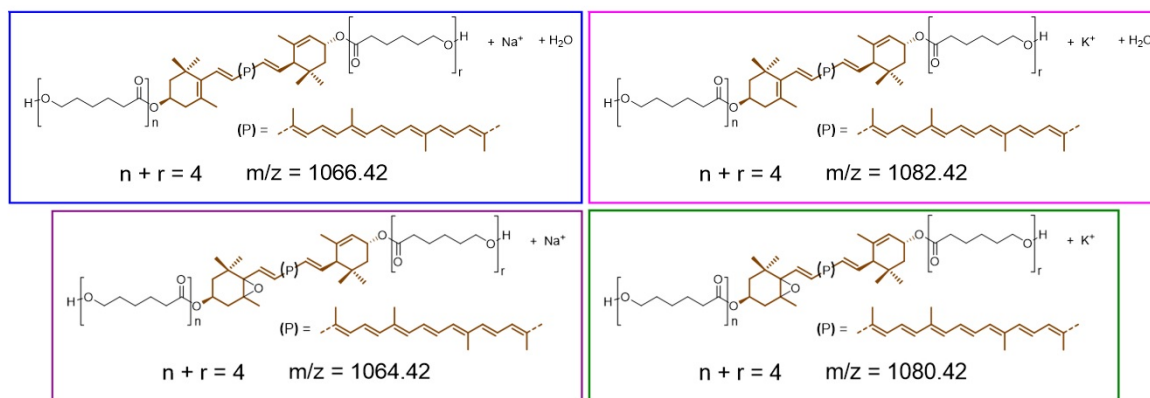

**Fig. S14.** Tentative structures of "epoxy"-xanthophylls-PCL. The presence of epoxy group contributed with a mass of 16 Da, which did not match with the experimental mass.

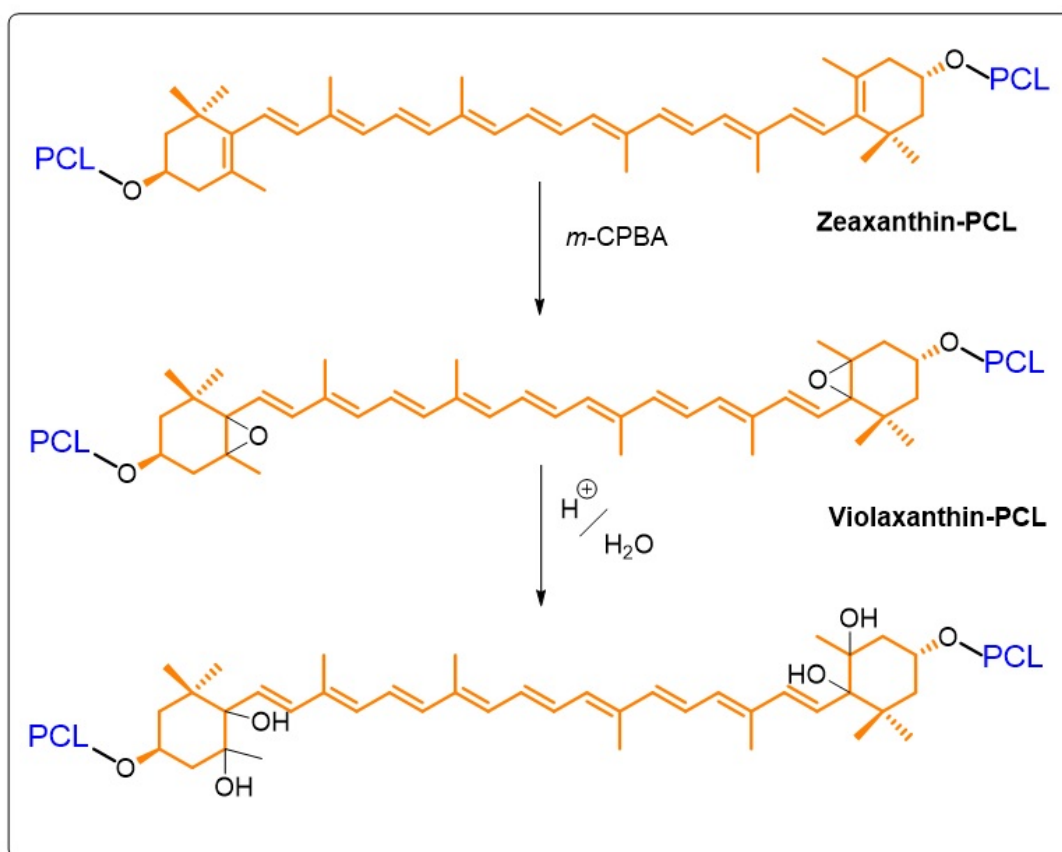

**Scheme S1.** Functionalization of "epoxy"-xanthophylls-PCL.

## Thermal properties of xanthophylls-PCL:

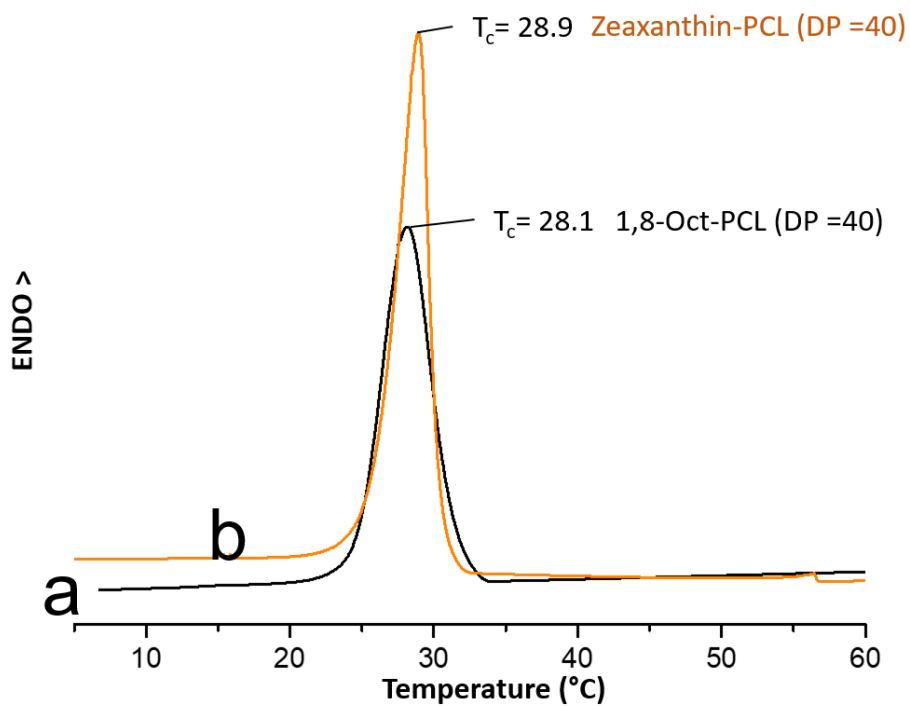

Fig. S15. DSC thermograms (cooling,  $T_c$ ) of a) 1,8-octanediol-PCL (DP = 40), and b) zeaxanthin-PCL (DP = 40).

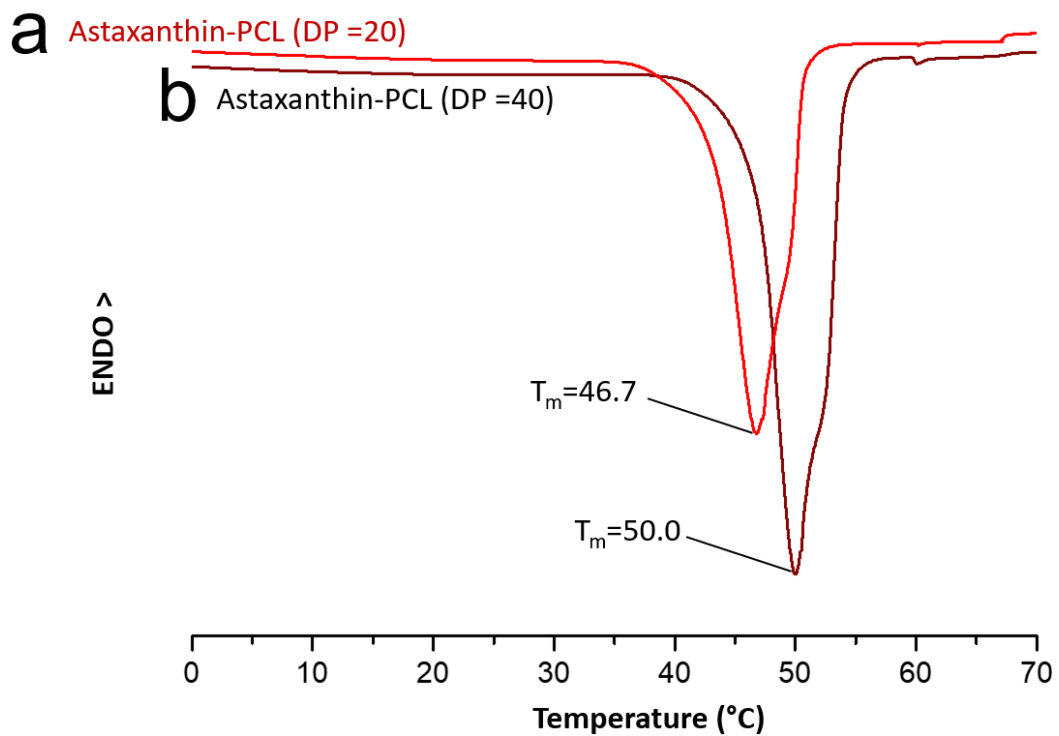

Fig. S16. DSC thermograms of the polyesters derived from astaxanthin.
